# Supplementary material for: Genome-wide analysis of long non-coding RNAs in adult tissues of the melon fly, Zeugodacus cucurbitae (Coquillett)
Source: PubMed Central journal article supplement (PMC7457495; doi:10.1186/s12864-020-07014-x), 2020-08-31

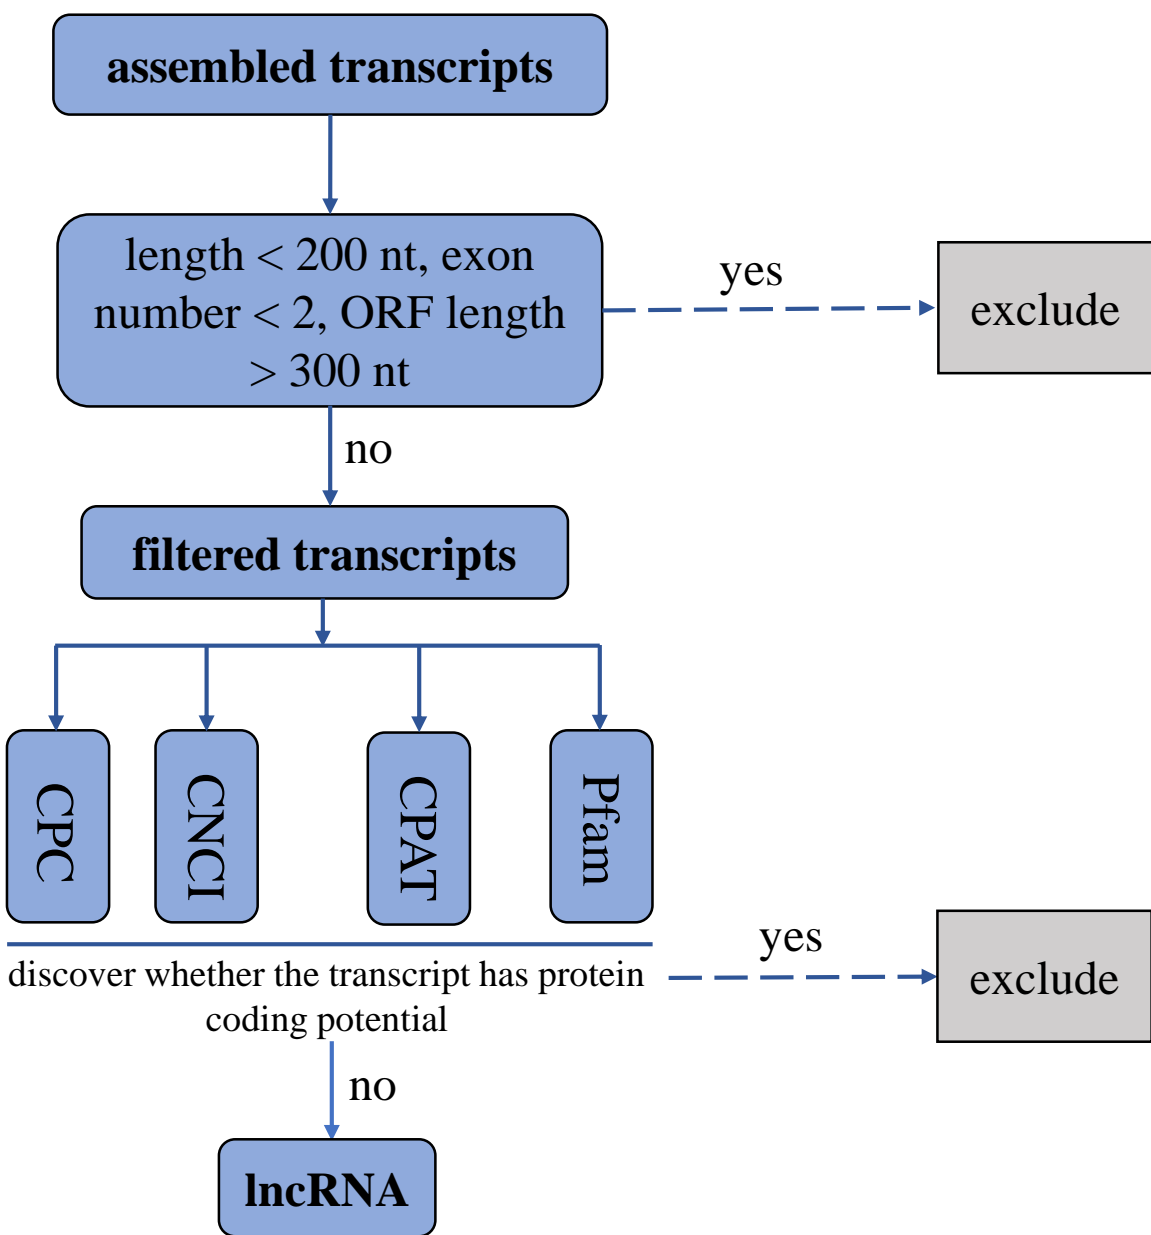

Supplement: 12864_2020_7014_MOESM1_ESM.pdf [file 12864_2020_7014_MOESM1_ESM.pdf]
